# Supplementary material
Source: publisher site journal article supplement (https://www.dovepress.com/article/267119)
Supplement: Supplementary file 1 [file get_supplementary_file.php]

1 ORIGINAL RESEARCH

2 Homsirikamol et al

3 **Inclusion of IR-820 into Soybean-Phosphatides-Based**  
4 **Nanoparticles for Near-Infrared-Triggered Release and**  
5 **Endolysosomal Escape in HaCaT Keratinocytes at**  
6 **Insignificant Cytotoxic Level**

7 Chaiyarek Homsirikamol,<sup>1</sup> Saroj Suvanasuthi,<sup>2</sup> Kwanchanok Viravaidya-Pasuwat<sup>1,3</sup>

8

9 <sup>1</sup>Mammalian Cell Culture Laboratory, Biological Engineering Program, Faculty of Engineering,  
10 King Mongkut's University of Technology Thonburi, Bangkok, Thailand; <sup>2</sup>Hair Diseases and Hair  
11 Transplantation Division, Faculty of Medicine, Siriraj Hospital, Mahidol University, Bangkok,  
12 Thailand; <sup>3</sup>Department of Chemical Engineering, Faculty of Engineering, King Mongkut's  
13 University of Technology Thonburi, Bangkok, Thailand

14

15 Correspondence: Kwanchanok Viravaidya-Pasuwat

16 Department of Chemical Engineering, Faculty of Engineering, King Mongkut's University of  
17 Technology Thonburi, Bangkok, 10140, Thailand

18 Tel +66 2 470 9221-30 Ext 205

19 Fax +66 2 428 3534

20 Email kwanchanok.vir@kmutt.ac.th

21

## Supplementary Tables

**Table S1** Methods and specifications for the quantitative determination of the substances encapsulated in the nanoparticles

| Substance   | Technique                 | Wavelength (nm)               | Disrupting agent  |
|-------------|---------------------------|-------------------------------|-------------------|
| IR-820      | UV-Vis-NIR spectroscopy   | 820                           | Methanol          |
| TPC         | UV-Vis-NIR spectroscopy   | 550                           | 0.1% Triton X-100 |
| BCIP        | UV-Vis-NIR spectroscopy   | 292                           | 1% Triton X-100   |
| TRITC-Dex40 | Fluorescence spectroscopy | Excitation/Emission = 551/582 | 1% Triton X-100   |

**Abbreviations:** TPC, total phenolic content; BCIP, 5-bromo-4-chloro-3-indolyl phosphate disodium salt; TRITC-Dex40, tetramethylrhodamine isothiocyanate-dextran (molecular weight = 40kDa); UV, ultraviolet; Vis, visible; NIR, near infrared.

**Table S2** Near-infrared fluence corresponding to the irradiation time using an 830-nm LED array providing the irradiance at 0.0118 W/cm<sup>2</sup>

| Irradiation time (minute) | Fluence (J/cm <sup>2</sup> ) |
|---------------------------|------------------------------|
| 2.0                       | 1.4                          |
| 2.8                       | 2.0                          |
| 5.0                       | 3.5                          |
| 7.1                       | 5.0                          |
| 10.0                      | 7.1                          |
| 14.1                      | 10.0                         |
| 20.0                      | 14.2                         |

|      |      |
|------|------|
| 28.2 | 20.0 |
| 30.0 | 21.2 |
| 45.0 | 31.9 |
| 60.0 | 42.5 |

**Abbreviation:** LED, light-emitting-diode.

**Table S3** Colocalization metrics and parameters

| Metric                                                                      | ImageJ plugin    | Parameter                                                      |
|-----------------------------------------------------------------------------|------------------|----------------------------------------------------------------|
| Van Steensel's cross-correlation coefficient ( <i>CCF</i> )                 | JACoP v.2.0      | Pixel shift ( $\Delta x$ ) = $\pm 20$ pixel                    |
| Threshold overlap score at the highest threshold ( <i>TOS<sub>h</sub></i> ) | EzColocalization | Threshold = 10% highest signal for both GFP and TRITC channels |
| Intensity correlation quotient ( <i>ICQ</i> )                               | EzColocalization | -                                                              |

**Abbreviations:** GFP, green fluorescent protein; TRITC, tetramethylrhodamine isothiocyanate.

**Table S4** Aligned Ranks Transformation ANOVA for the *ICQ* and *TOS<sub>h</sub>* ratios according to the nanoparticle formulation, the time after irradiation, and their interactions

| Colocalization metric                                                     |                        | Degree of freedom | Residual degree of freedom | <i>F</i> | <i>P</i>      |
|---------------------------------------------------------------------------|------------------------|-------------------|----------------------------|----------|---------------|
| <i>ICQ</i> <sub>(+)<i>irr</i></sub> / <i>ICQ</i> <sub>(-)<i>irr</i></sub> | Formulation            | 1                 | 18                         | 0.79688  | 0.3838        |
|                                                                           | Time after irradiation | 2                 | 18                         | 6.32207  | <b>0.0083</b> |

|                                        |                                         |   |    |         |               |
|----------------------------------------|-----------------------------------------|---|----|---------|---------------|
|                                        | Formulation × Time<br>after irradiation | 2 | 18 | 3.37523 | 0.0569        |
| $TOS_{h,(+)irr} /$<br>$TOS_{h,(-)irr}$ | Formulation                             | 1 | 18 | 2.9403  | 0.1036        |
|                                        | Time after irradiation                  | 2 | 18 | 14.3680 | <b>0.0002</b> |
|                                        | Formulation × Time<br>after irradiation | 2 | 18 | 10.9500 | <b>0.0008</b> |

49

50 **Note:** Bolded numbers indicate statistically significant differences with  $P < 0.05$ .

51 **Abbreviations:** ANOVA, analysis of variance;  $ICQ$ , intensity correlation quotient;  $TOS_h$ , threshold  
52 overlap score at the highest threshold;  $irr$ , irradiation.

53

54

55 **Table S5** Tukey post-hoc test for the  $ICQ$  and  $TOS_h$  ratios on the statistically significant main

56 effect and the interactions between the nanoparticle formulation and the time after irradiation

57

| Colocalization metric                               | $ICQ_{(+ )irr} / ICQ_{(- )irr}$ | $TOS_{h,(+)irr} / TOS_{h,(-)irr}$ |
|-----------------------------------------------------|---------------------------------|-----------------------------------|
|                                                     | $P$                             | $P$                               |
| <i>Main effect: time after irradiation</i>          |                                 |                                   |
| 0 hr – 2 hr                                         | <b>0.0123</b>                   | <b>0.0018</b>                     |
| 0 hr – 4 hr                                         | 0.9429                          | 0.6381                            |
| 2 hr – 4 hr                                         | <b>0.0245</b>                   | <b>0.0002</b>                     |
| <i>Interactions</i>                                 |                                 |                                   |
| TRITC-Dex40-IR-NP × 0 hr – TRITC-Dex40-IR-NP × 2 hr | -                               | 0.0654                            |
| TRITC-Dex40-IR-NP × 0 hr – TRITC-Dex40-IR-NP × 4 hr | -                               | 0.9841                            |
| TRITC-Dex40-IR-NP × 2 hr – TRITC-Dex40-IR-NP × 4 hr | -                               | 0.2149                            |
| TRITC-Dex40-IR-NP × 0 hr – TRITC-Dex40-NP × 0 hr    | -                               | 0.1723                            |
| TRITC-Dex40-IR-NP × 0 hr – TRITC-Dex40-NP × 2 hr    | -                               | 0.9515                            |

|                                                  |   |               |
|--------------------------------------------------|---|---------------|
| TRITC-Dex40-IR-NP × 0 hr – TRITC-Dex40-NP × 4 hr | - | 0.7334        |
| TRITC-Dex40-IR-NP × 2 hr – TRITC-Dex40-NP × 0 hr | - | 0.9942        |
| TRITC-Dex40-IR-NP × 2 hr – TRITC-Dex40-NP × 2 hr | - | <b>0.0114</b> |
| TRITC-Dex40-IR-NP × 2 hr – TRITC-Dex40-NP × 4 hr | - | 0.5772        |
| TRITC-Dex40-IR-NP × 4 hr – TRITC-Dex40-NP × 0 hr | - | 0.4608        |
| TRITC-Dex40-IR-NP × 4 hr – TRITC-Dex40-NP × 2 hr | - | 0.6566        |
| TRITC-Dex40-IR-NP × 4 hr – TRITC-Dex40-NP × 4 hr | - | 0.9759        |
| TRITC-Dex40-NP × 0 hr – TRITC-Dex40-NP × 2 hr    | - | <b>0.0340</b> |
| TRITC-Dex40-NP × 0 hr – TRITC-Dex40-NP × 4 hr    | - | 0.8653        |
| TRITC-Dex40-NP × 2 hr – TRITC-Dex40-NP × 4 hr    | - | 0.2651        |

58

59 **Note:** Bolded numbers indicate statistically significant differences with  $P < 0.05$ .

60 **Abbreviations:** *ICQ*, intensity correlation quotient; *TOS<sub>h</sub>*, threshold overlap score at the highest

61 threshold; *irr*, irradiation; TRITC-Dex40, tetramethylrhodamine isothiocyanate-dextran (molecular

62 weight = 40kDa); IR, IR-820.

63

## Supplementary Figures

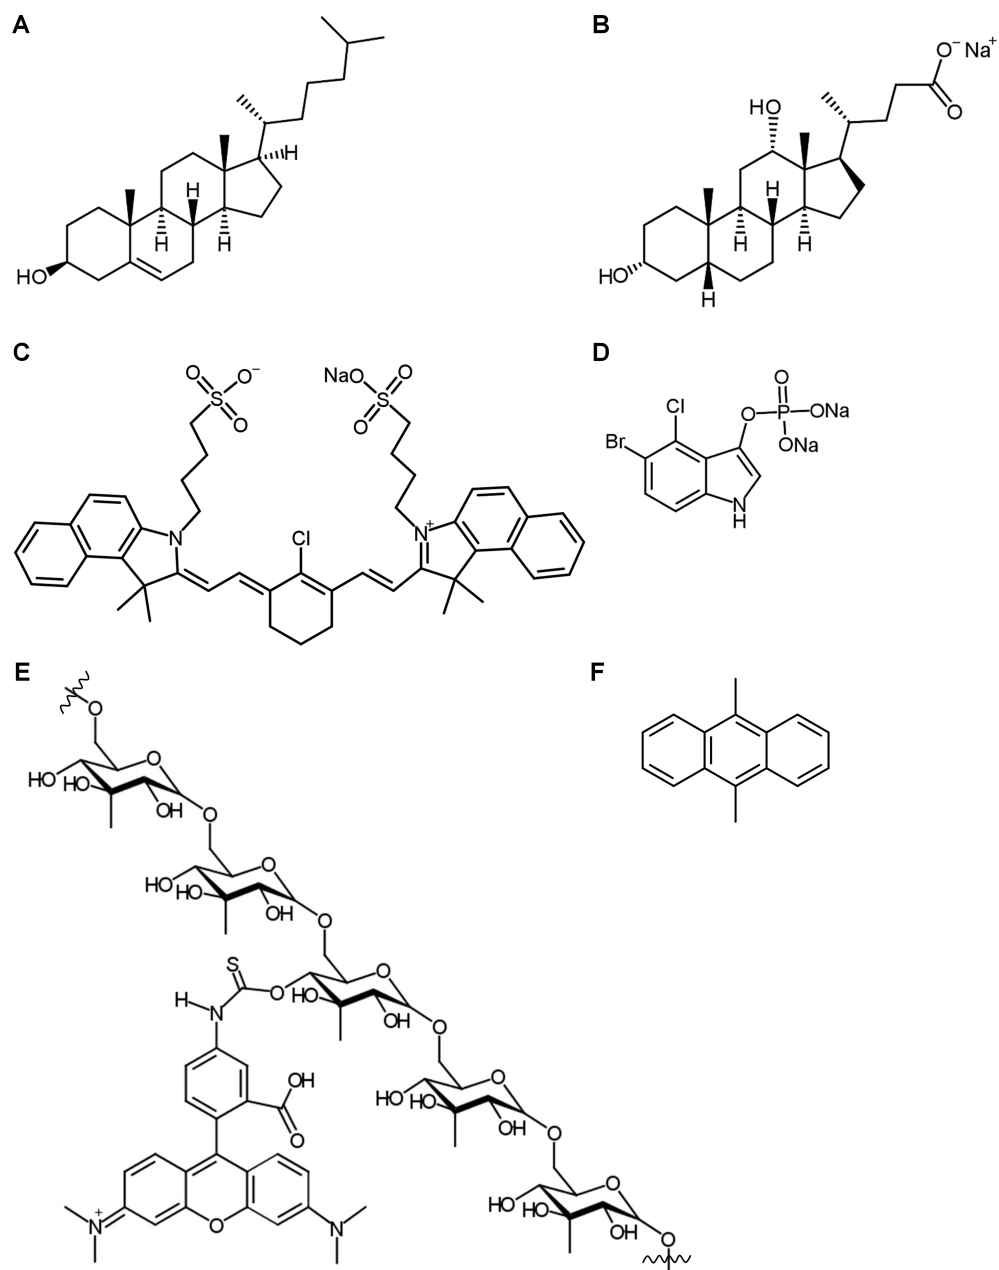

**Figure S1** Chemical structures of **(A)** cholesterol, **(B)** sodium deoxycholate, **(C)** IR-820, **(D)** BCIP, **(E)** TRITC-Dex40, and **(F)** DMA.

**Abbreviations:** BCIP, 5-bromo-4-chloro-3-indolyl phosphate disodium salt; TRITC-Dex40, tetramethylrhodamine isothiocyanate-dextran (molecular weight = 40kDa); DMA, 9,10-dimethylantracene.

72

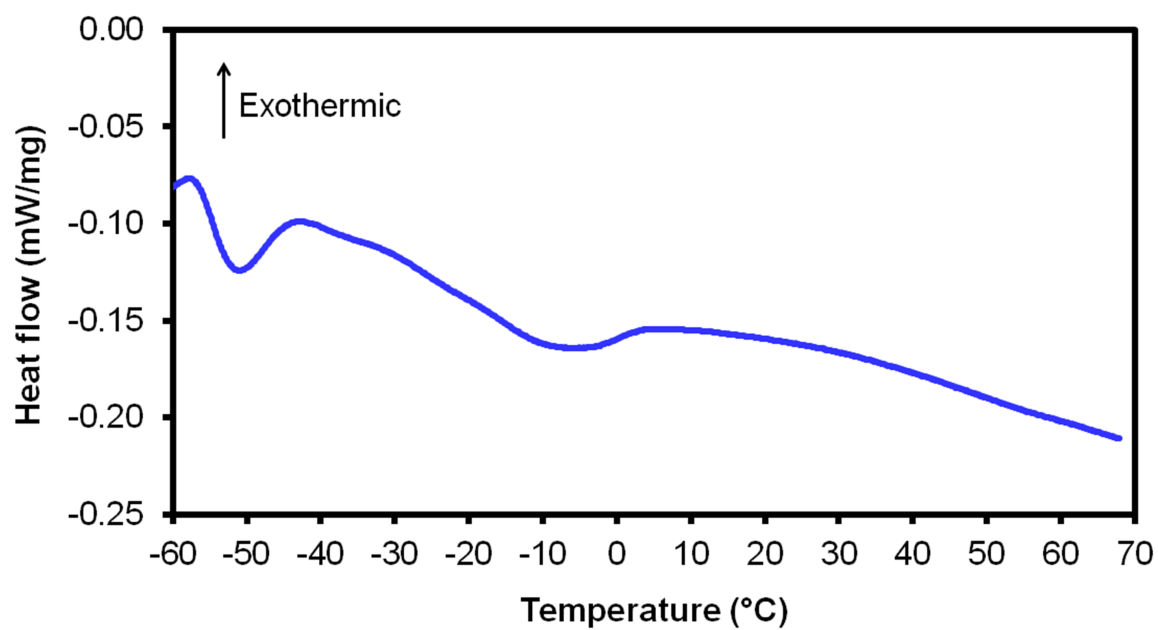

73

74

**Figure S2** DSC thermogram of the NP nanoparticles.

75

**Abbreviation:** DSC, differential scanning calorimetry.

76

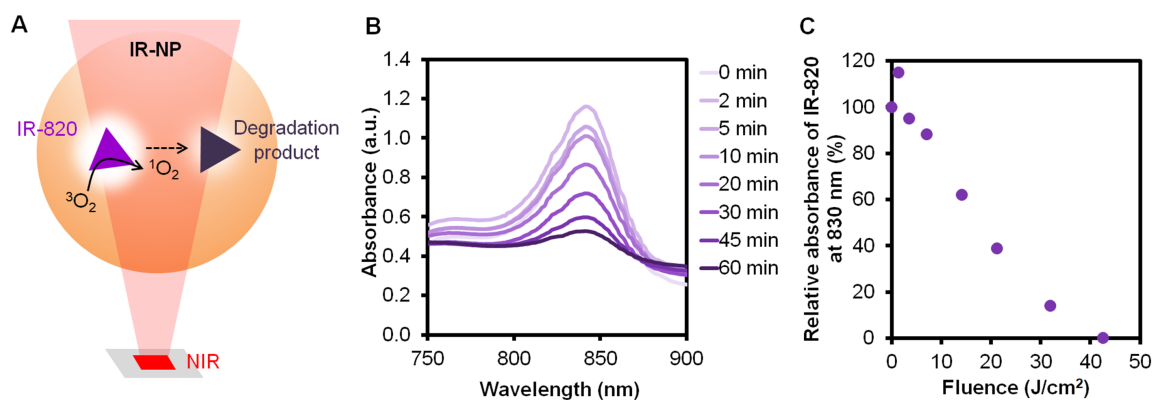

**Figure S3 (A)** Interpretive illustration of the possible event resulting in **(B)** absorption spectra of the IR-NP irradiated with 830-nm NIR at  $0.0118 \text{ W}/\text{cm}^2$  at different time points, and **(C)** relative absorbance percentages of IR-820 in IR-NP at 830 nm corresponding to NIR fluence.

**Abbreviations:** IR, IR-820;  $^3\text{O}_2$ , triplet oxygen;  $^1\text{O}_2$ , singlet oxygen; NIR, near infrared.

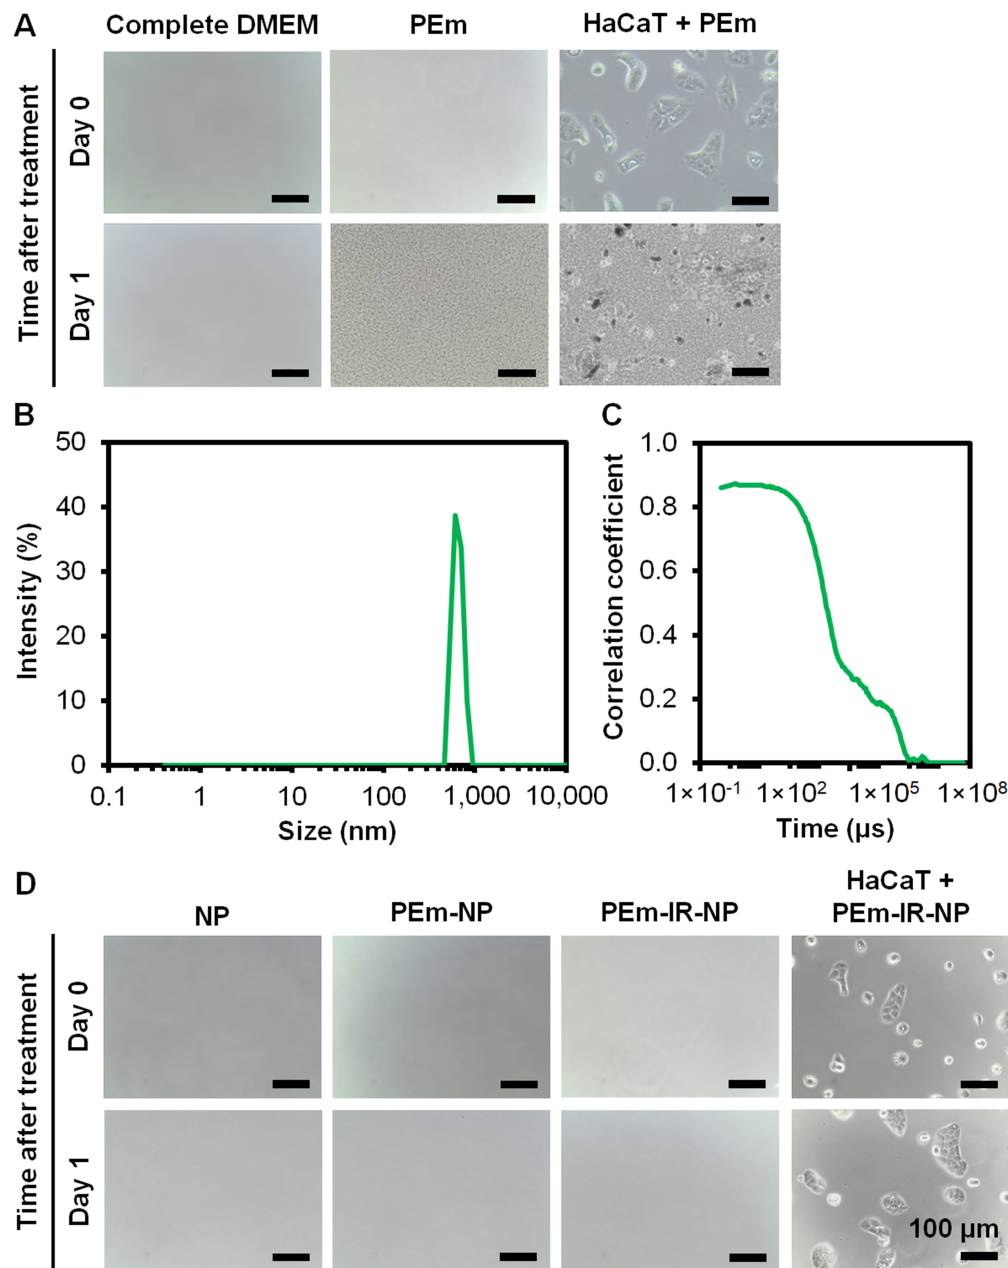

**Figure S4** (A) Phase-contrast images of complete DMEM as a blank, PEm, and PEm-treated HaCaT keratinocytes on Day 0 and Day 1 post treatment, (B) intensity-weighted hydrodynamic size distribution of PEm dispersed in PBS (pH 7.4), (C) corresponding correlogram, and (D) the absence of precipitates in complete DMEM with NP, PEm-NP, PEm-IR-NP, and the HaCaT cells treated with PEm-IR-NP; Scale bar = 100  $\mu$ m.

**Abbreviations:** DMEM, Dulbecco's modified Eagle medium; PEm, *Phyllanthus emblica* L. fruit extract; PBS, phosphate-buffered saline; IR, IR-820.

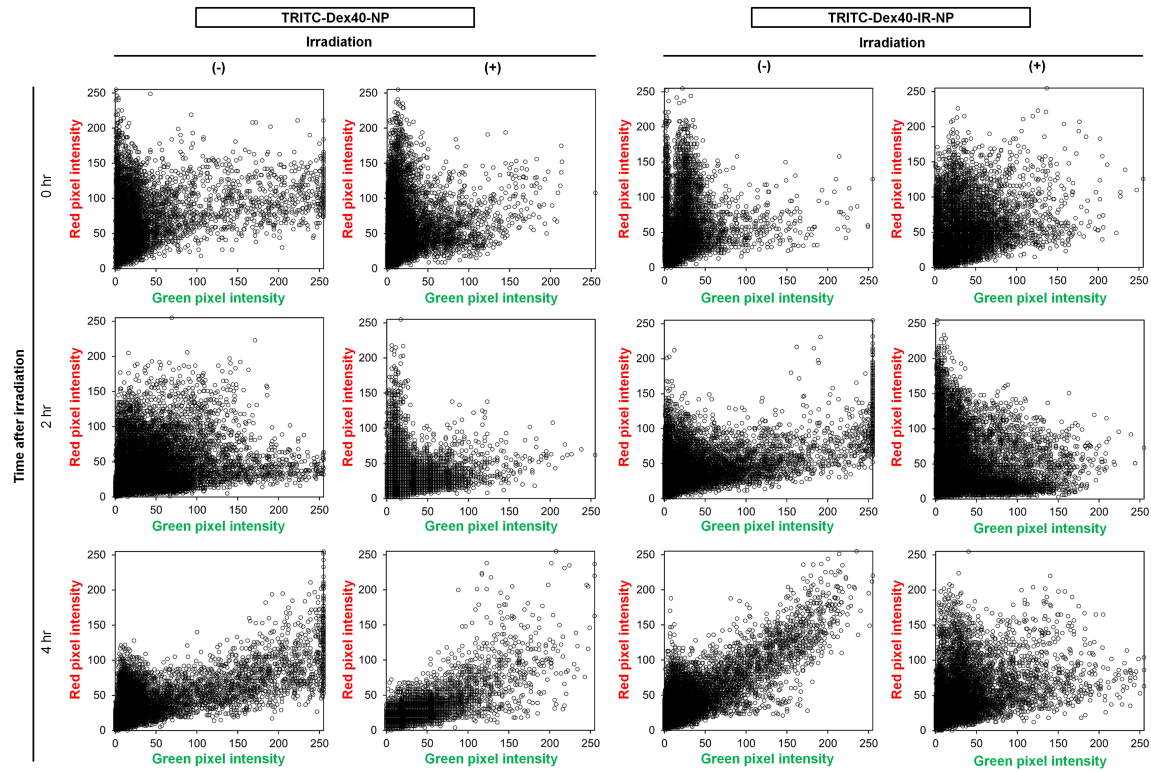

96

97 **Figure S5** Scatterplots of the red (TRITC-Dex40) and green (LAMP1-GFP) pixel intensities of  
 98 deconvoluted fluorescence images of the HaCaT keratinocytes at 0, 2, and 4 hours after the  
 99 treatment with TRITC-Dex40-NP and TRITC-Dex40-IR-NP for six hours with and without 830-nm  
 100 irradiation at fluence of 20 J/cm<sup>2</sup>.

101 **Abbreviations:** TRITC-Dex40, tetramethylrhodamine isothiocyanate-dextran (molecular weight =  
 102 40kDa); LAMP1, lysosomal-associated membrane protein 1; GFP, green fluorescent protein; IR,  
 103 IR-820.
